# Supplementary material for: Transcriptome Analysis of mfs2-Defective Penicillium digitatum Mutant to Reveal Importance of Pdmfs2 in Developing Fungal Prochloraz Resistance
Source: MDPI journal article supplement (doi:10.3390/microorganisms12050888), 2024-04-28
Supplement: s1 [file s1]

**Transcriptome analysis of *mfs2*-defective *Penicillium digitatum* mutant to reveal importance of *Pdmfs2* in developing fungal prochloraz-resistance**

Rongrong Cuan<sup>1</sup>, Shaoting Liu<sup>2</sup>, Chuanyou Zhou<sup>1</sup>, Shengqiang Wang<sup>1</sup>, Yongliang Zheng<sup>3</sup>, Yongze Yuan<sup>1\*</sup>

<sup>1</sup>Hubei Key Laboratory of Genetic Regulation and Integrative Biology, School of Life Sciences, Central China Normal University, Wuhan, 430079, China;

<sup>2</sup>School of Political and Law, Huanggang Normal University, Huanggang, 438000, China;

<sup>3</sup>Hubei Key Laboratory of Economic Forest Germplasm Improvement and Resources Comprehensive Utilization & Hubei Collaborative Innovation Center for the Characteristic Resources Exploitation of Dabie Mountains, Huanggang Normal University, Huanggang, 438000, China.

\*Correspondence: yyz2007980080@ccnu.edu.cn

## Supplementary Materials

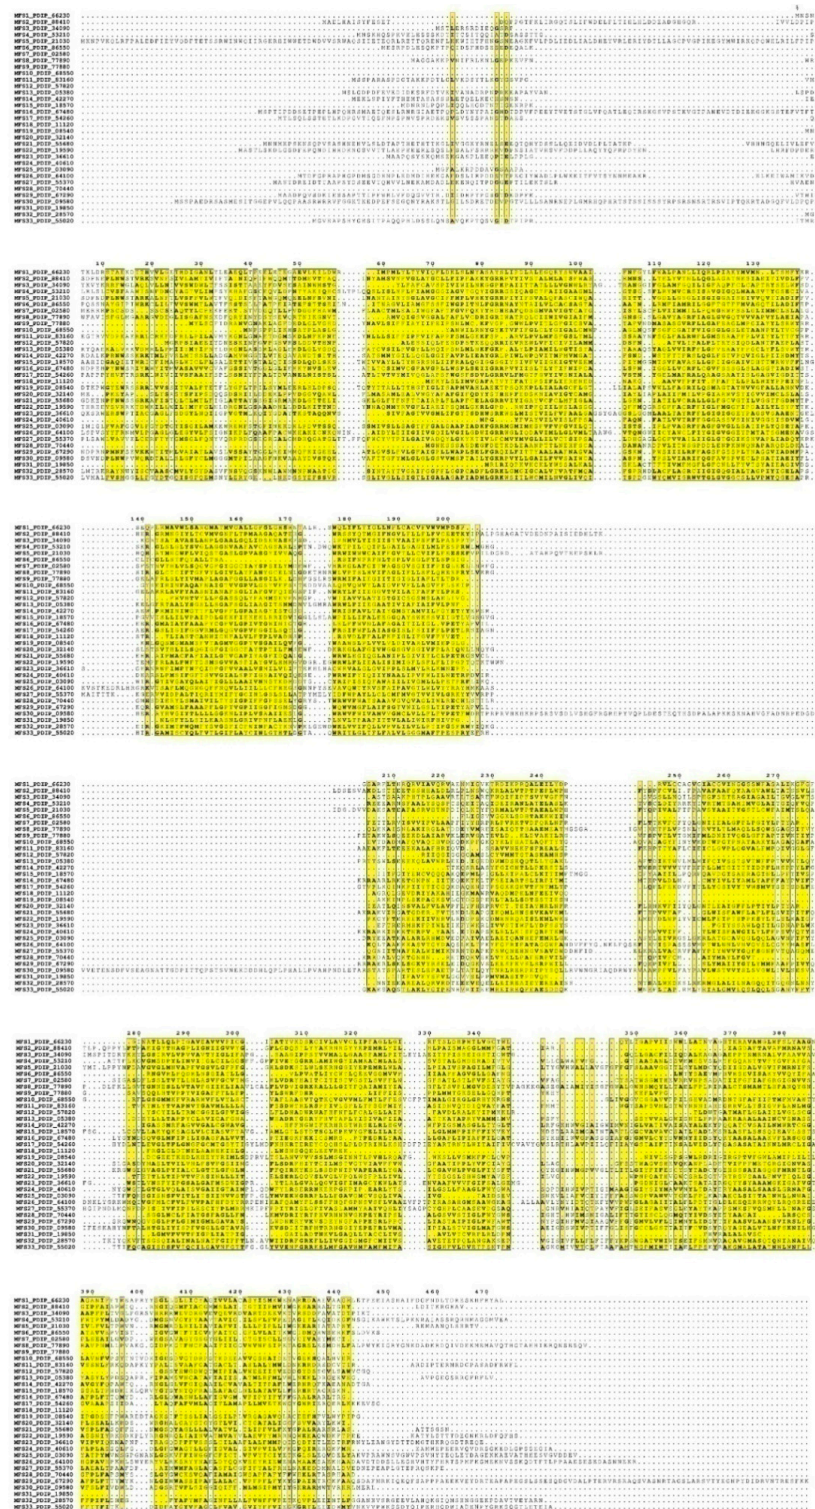

**Figure S1.** Protein homology alignments for multiple isoforms of MFS (MFS1-33), ABC (ABC1-8), and MATE (MATE1-3) in the present study.



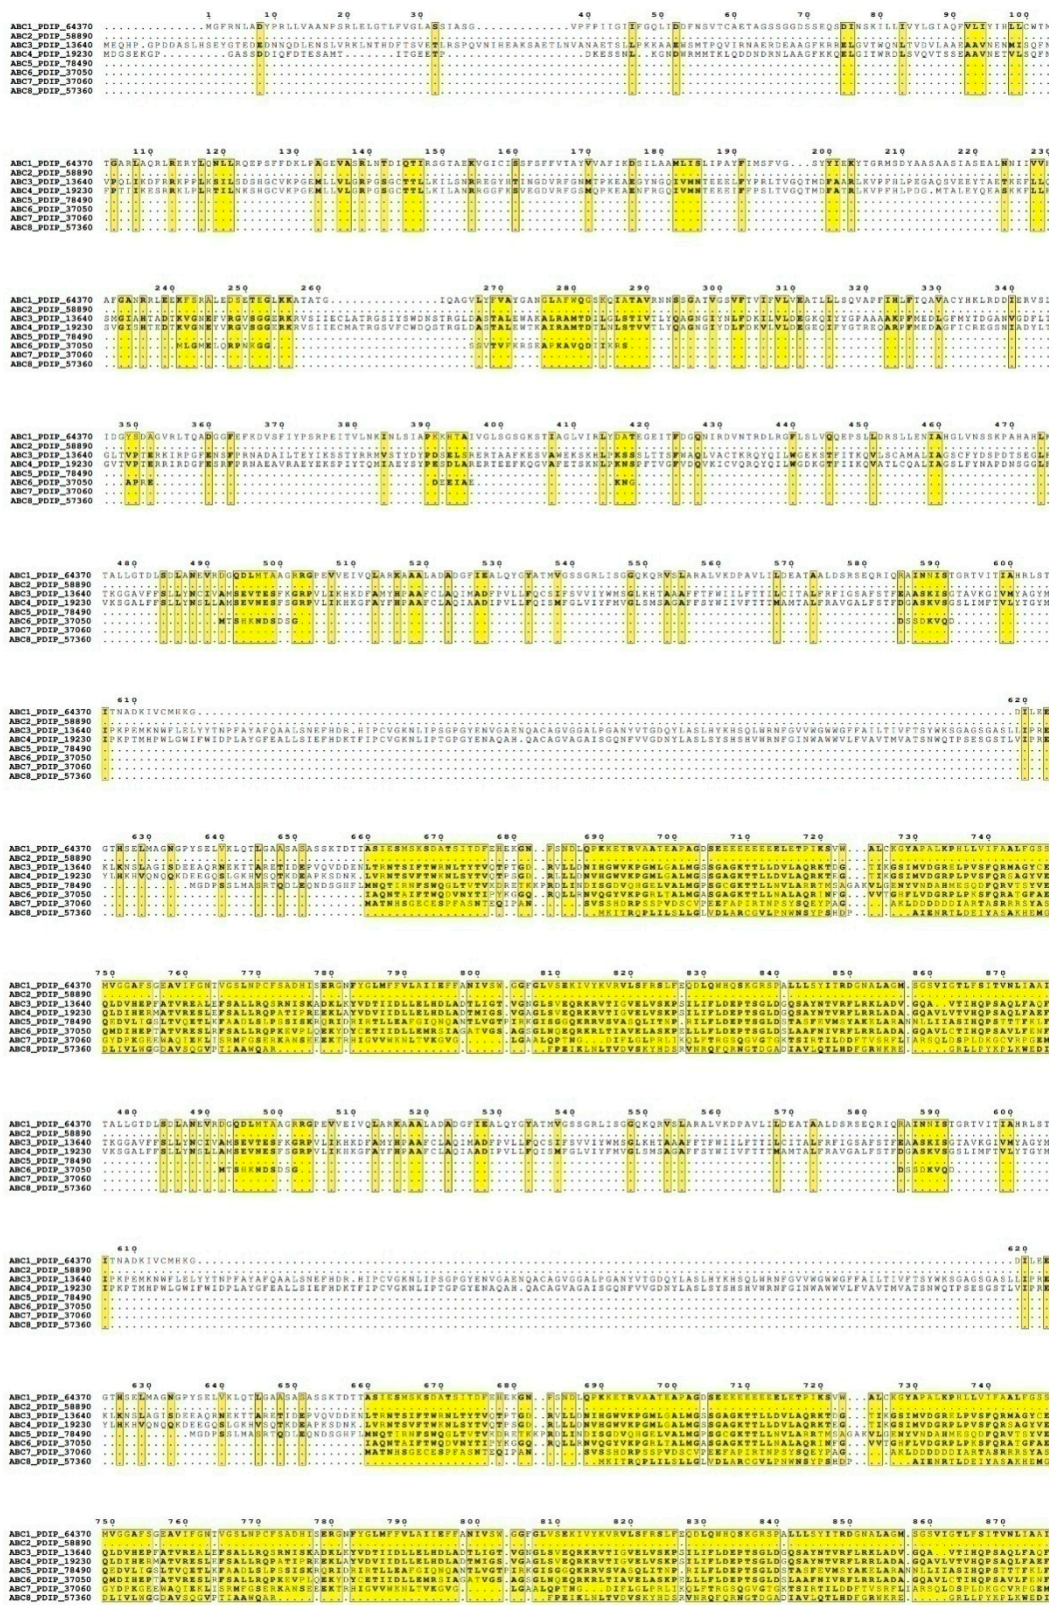

**Figure S1 (continued).** Protein homology alignments for multiple isoforms of MFS (MFS1-33),

ABC (ABC1-8), and MATE (MATE1-3) in the present study.



**Table S1** Primers used in the present qRT-PCR.

| Gene name    | Primer | Sequence (5'→3')      | Fragment size amplified |
|--------------|--------|-----------------------|-------------------------|
| <i>MFS1</i>  | F      | GCCCACAGCACAAACCAAAG  | 108                     |
|              | R      | CATGCGCAAGGGTTGTTTCAG |                         |
| <i>MFS2</i>  | F      | ACATCTTCCGGCGATTTCCAT | 109                     |
|              | R      | GAACCTTAGCCCAAGTGCCA  |                         |
| <i>MFS3</i>  | F      | CGATCATCGTACGTGAAACCC | 106                     |
|              | R      | CTGCGACGGTTGACTGTTTG  |                         |
| <i>MFS4</i>  | F      | AATGCTTCCTGAGTCTCCGC  | 107                     |
|              | R      | TGATTTCTGCGAACACGGA   |                         |
| <i>MFS5</i>  | F      | TGCATCCAGAGAGCATGACC  | 106                     |
|              | R      | ATCCCACAGCAAGAAGAGCC  |                         |
| <i>MFS6</i>  | F      | CTGTGAGCTTTTGCAATGGGA | 108                     |
|              | R      | CCCATTGTTGATGGCAAGC   |                         |
| <i>MFS7</i>  | F      | GCTAACACCAAGCACAGGGA  | 104                     |
|              | R      | CAGCCCTAGTGATGAGAACCA |                         |
| <i>MFS8</i>  | F      | CTTCACGGGCTTCGTCTACC  | 108                     |
|              | R      | TGGATCGCACATACCCATCG  |                         |
| <i>MFS9</i>  | F      | CAAACCTGGACAACGCTGACG | 104                     |
|              | R      | GCAAGCTCACCTCGTCGATA  |                         |
| <i>MFS10</i> | F      | CGCTCCCCGCTTCATCTTAT  | 105                     |
|              | R      | GCCAGGTGTCCTTGACGTAG  |                         |
| <i>MFS11</i> | F      | GTGTGATGGACGAGGGGAC   | 110                     |
|              | R      | TGCAGACGTACACATCACCG  |                         |
| <i>MFS12</i> | F      | GGAGCTCTTATCACTGGGGG  | 107                     |
|              | R      | TGGATGCACAGCCCACTTAG  |                         |

|              |   |                       |     |
|--------------|---|-----------------------|-----|
| <i>MFS13</i> | F | TAGCAACGCCAGCAGTATCT  | 105 |
|              | R | CTGGGATCCCCAGAAAGACA  |     |
| <i>MFS14</i> | F | ATCGGTTGGGTACTGTCTGTG | 102 |
|              | R | AATGGCTGAGACACAGGTCG  |     |
| <i>MFS15</i> | F | ATGCTAAACCGCCTCAACCA  | 106 |
|              | R | TCAGCGTGAAGAATGGCAGA  |     |
| <i>MFS16</i> | F | GGACCCTGTGTTCCCTGAAG  | 105 |
|              | R | TTCGTGGATGGAACAGAGCC  |     |
| <i>MFS17</i> | F | GTGAGCTCATGGCTTTCCGA  | 108 |
|              | R | ACGCACGTTAGGGTAAGACAC |     |
| <i>MFS18</i> | F | TGGTTGGAGCGTTTGCTACT  | 106 |
|              | R | TGCCCCTGGAAACCAATCAA  |     |
| <i>MFS19</i> | F | AGCCATGGGGCTATGAATGG  | 106 |
|              | R | AGTGCTCGGGTGAATGACAC  |     |
| <i>MFS20</i> | F | GCTCCTTACGGCAAGGTGAA  | 104 |
|              | R | ACTGGTTCAAAAGCCACTGGA |     |
| <i>MFS21</i> | F | GTCGGCGGTACTTTTGGAGA  | 105 |
|              | R | GTAGATGGGAGCACCGACTG  |     |
| <i>MFS22</i> | F | TGACCCGAATTCCATTGCCA  | 110 |
|              | R | CGTCCGGATCGAATCTGTGT  |     |
| <i>MFS23</i> | F | TCACTGTGTATCTTGGCCGC  | 103 |
|              | R | AAAGTGAGCACGTCAACGGA  |     |
| <i>MFS24</i> | F | CGAGTGTTGTCGGTATTGCAC | 109 |
|              | R | TCTTTGCGGAGGAAAAGGCT  |     |
| <i>MFS25</i> | F | TGGGTAGGTCCCACTCACAT  | 103 |
|              | R | TCTTCATGGCGAGGATACCG  |     |
| <i>MFS26</i> | F | AGCAGTGGATCAACGCCATT  | 106 |
|              | R | ACGGACGGTAGAATTGCAGC  |     |

|              |   |                        |     |
|--------------|---|------------------------|-----|
| <i>MFS27</i> | F | CCCAGAGCGCAGCTAATACT   | 109 |
|              | R | TCCTTCTCCAAATCGGCATCC  |     |
| <i>MFS28</i> | F | CTCACCTACTCCATTGGCCC   | 107 |
|              | R | CCCAAATTCCAGGCTAGGCA   |     |
| <i>MFS29</i> | F | TCGCGGTAAGACTTCGACTC   | 109 |
|              | R | CAGTGGAGCCCAGAGCAATG   |     |
| <i>MFS30</i> | F | GCGCCAAATCAACATTGGGA   | 108 |
|              | R | AGTCCCCGTTTCACCAAACA   |     |
| <i>MFS31</i> | F | CGTTTTCACATCGTGCCTGG   | 109 |
|              | R | CGTCCGGAGTTATACTCGCC   |     |
| <i>MFS32</i> | F | AAACACCCCAACTCGCCAAT   | 108 |
|              | R | AGACAGTGAGGAGAGGGAACT  |     |
| <i>MFS33</i> | F | CTCCTCGTATGCTCTACCGC   | 107 |
|              | R | GCAATGGCTGTAGAAACTGACA |     |
| <i>ABC1</i>  | F | AGGTGCCACTGTTGGATCTG   | 108 |
|              | R | GGGTAGCTGTCGGTGATGTT   |     |
| <i>ABC2</i>  | F | GCGCTCTACAGAAGGTACGA   | 107 |
|              | R | GCAGAGGAGTTGCTTTTGGC   |     |
| <i>ABC3</i>  | F | TCTGGTAAGCTGTCGTCTTCC  | 103 |
|              | R | AGCGGACCCGATAAATCGAA   |     |
| <i>ABC4</i>  | F | CCTGGGCGTAAGTTTTCTTCA  | 110 |
|              | R | CTATTTGGGCGTAGGGGACC   |     |
| <i>ABC5</i>  | F | TTCACCAAAGAGCGAGCCAA   | 106 |
|              | R | TGGCAGGAGATAGTGAGGACA  |     |
| <i>ABC6</i>  | F | ATTTGCACGGTGTGAGCAAC   | 105 |
|              | R | GCGCAGCATAGAAGACACGA   |     |
| <i>ABC7</i>  | F | GGTAATCAACGAGCGGGCTA   | 106 |
|              | R | AGAAACACACACCTTCAGACCT |     |

|                                                  |   |                        |     |
|--------------------------------------------------|---|------------------------|-----|
| <i>ABC8</i>                                      | F | AAACACGAGATGGGTGACCTC  | 108 |
|                                                  | R | GCTTACAGCTTTTCAACCGTGT |     |
| <i>MATE1</i>                                     | F | ACTGGCACTTATCTGTGGCT   | 102 |
|                                                  | R | GGCCAGTCTTACCTGGATTGT  |     |
| <i>MATE2</i>                                     | F | GACGCGAGAACAATTTGCGA   | 105 |
|                                                  | R | AGCCCATCGGCAATCTGAAA   |     |
| <i>MATE3</i>                                     | F | GTGCAAGGCAAACGATGTGA   | 109 |
|                                                  | R | AGTGCTTTACAACGCAGGGA   |     |
| <i>1,3,6,8-Tetrahydroxynaphthalene reductase</i> | F | TCCAAGCCGACCTGACAAAT   | 105 |
|                                                  | R | TCTCAGTTCCTGCGTTCGAC   |     |
| <i>4-Hydroxyphenylpyruvate dioxygenase</i>       | F | CAGTTGTCGACGAGGCATCT   | 111 |
|                                                  | R | CAGTTGTCGACGAGGCATCT   |     |
| <i>60S Acidic ribosomal phosphoprotein</i>       | F | CGAGAAGGTCATCTCCGAGC   | 108 |
|                                                  | R | CAGCTATGGAAAGGGTCAGCA  |     |
| <i>60S Ribosomal protein</i>                     | F | TCCGCCGTCTGAGTTGTATG   | 106 |
|                                                  | R | GACCTTAAGGGCTGCTCAGAA  |     |
| <i>40S Ribosomal protein</i>                     | F | CCGCAAGAAGATCCACGAGT   | 103 |
|                                                  | R | ATCCGCTCTAAGGTGACGGA   |     |
| <i>Ribosomal protein</i>                         | F | CGAACAGTCAACTGGGGTGA   | 106 |
|                                                  | R | TCTGGAAGCCGTTCTGGAAG   |     |
| <i>Acetyl-CoA carboxylase</i>                    | F | GGCTTATGAGACCTTCGGCA   | 104 |
|                                                  | R | ATTGGTCGGCCATGCGAATA   |     |
| <i>Alcohol dehydrogenase</i>                     | F | GCGTCGGAGTACCACGTATT   | 109 |
|                                                  | R | GGATGAGGCTCGTG TAGTCG  |     |
| <i>Aldehyde dehydrogenase</i>                    | F | TGGTTAGTCGTGTGCAGCAT   | 103 |
|                                                  | R | CCCGTATTACCGATCCGCTC   |     |
| <i>Aldehyde reductase</i>                        | F | GTGCACCAGATGGAGTGTCA   | 107 |
|                                                  | R | TTCTGGTTACCAAACGGCGA   |     |



|                                     |   |                           |     |
|-------------------------------------|---|---------------------------|-----|
| <i>Amine oxidase</i>                | F | GGTGTCTCCTTCAAGGTCCG      | 106 |
|                                     | R | GAGTGCGCACATCGGAGATA      |     |
| <i>Amino acid permease</i>          | F | AGGGCTTTTCGTTACTGGAGC     | 109 |
|                                     | R | CCAGCTTGAATAAGCACCGC      |     |
| <i>ATP synthase subunit 6</i>       | F | CAGGTTGTCCTTTAGCTTTATTACC | 113 |
|                                     | R | GTGACCACTTAATATGTTAGCAGC  |     |
| <i>Erg1</i>                         | F | GAGCAGAAAGTCGGTCCCAA      | 108 |
|                                     | R | CTCGGTGATACTGGCGTGAA      |     |
| <i>Erg3</i>                         | F | AACGAAGATGGGCGATGAGG      | 106 |
|                                     | R | CTTCGTGTCGGAGGAGTAGC      |     |
| <i>Erg24</i>                        | F | CAATGGTATGGCAACGGCAG      | 103 |
|                                     | R | ATGATGGCAGAGGAGAACGC      |     |
| <i>Erg25</i>                        | F | TGGCATTACTTCTCCCACCG      | 107 |
|                                     | R | GCATATTCAGCAGCCAAGCC      |     |
| <i>Carnitine acetyl transferase</i> | F | GGCCATGAGCTCGTATCAGT      | 104 |
|                                     | R | CGACGATGTGCTGGTTTTTCG     |     |
| <i>Catalase</i>                     | F | TTCTGGGATTTCCACGCGAA      | 106 |
|                                     | R | TACCGAACCCTGTCATTTCGG     |     |
| <i>Cytochrome b</i>                 | F | TAATCGACGCACCAACACCA      | 109 |
|                                     | R | TGCATAGCTAATGTAACCTCCTGT  |     |
| <i>Cytochrome c oxidase</i>         | F | TGGTACTGGTTTCCACGGTT      | 111 |
|                                     | R | TCGTAACCAAGGTGATGGTGA     |     |
| <i>RNA helicase</i>                 | F | AGGTGAGTTTGCACGAGAGG      | 101 |
|                                     | R | GAGACGAACGTTCTCCAGCA      |     |
| <i>Dienelactone hydrolase</i>       | F | TACGGTGATGCTGTGCCTTT      | 106 |
|                                     | R | CAACGGTTGAGGGGAGATGA      |     |
| <i>Epoxide hydrolase</i>            | F | CCCACGGCCAAGTATTCCT       | 108 |
|                                     | R | CGACCGAACAACCTTCTCCA      |     |

|                                                       |   |                          |     |
|-------------------------------------------------------|---|--------------------------|-----|
| <i>Exopolygalacturonase</i>                           | F | TGTAAAGCGCATTGGGGGAT     | 103 |
|                                                       | R | TGCTTGCCAGTAATCGGTGT     |     |
| <i>Exo-<math>\beta</math>-1,3-glucanase</i>           | F | ATCGATTTTTTGACGCCGCTG    | 103 |
|                                                       | R | GCTCCAGTGTTGGGACAGAA     |     |
| <i>Fatty acid synthase <math>\beta</math> subunit</i> | F | CGCAGCATCTACACCACGTA     | 105 |
|                                                       | R | GTAGAGCTTGCTAGCCTCGG     |     |
| <i>Fatty acyl-CoA oxidase</i>                         | F | GTGACTCTCCGGAACAAGG      | 107 |
|                                                       | R | CCGTGGCCCAATTCTGTTTG     |     |
| <i>FMN dependent dehydrogenase</i>                    | F | GCGGCGCTGATATTGTGAAG     | 106 |
|                                                       | R | TGGCTCACTCCATGTTCAAC     |     |
| <i>Glutathione S-transferase</i>                      | F | CTCGGGCTATTGCGAGGTAT     | 103 |
|                                                       | R | CTTGCTGCTTGCTCGAAGAG     |     |
| <i>Glycerol kinase</i>                                | F | ATCAAGGCACTACGAGCACC     | 102 |
|                                                       | R | ACCCCGGGATCGGGTATATT     |     |
| <i>Glyoxylate reductase</i>                           | F | CTTTGTCGTTGCACCGTTGA     | 107 |
|                                                       | R | TTGCCGATGACTCGACTAGC     |     |
| <i>Maleylacetoacetate isomerase</i>                   | F | GCGGCTTGGTGTTGACTTG      | 101 |
|                                                       | R | CCTGTGACCTCCAATGTCCC     |     |
| <i>MAP kinase kinase kinase</i>                       | F | CATTGGATCGCGTGCTTCTG     | 104 |
|                                                       | R | AAGCTCGAGGAAATCAGCCC     |     |
| <i>NADH dehydrogenase subunit 1</i>                   | F | TGCATTTGTAACTATAGCCGAACG | 106 |
|                                                       | R | AGCATCAGCAAATGCTTGTAAT   |     |
| <i>NADH dehydrogenase subunit 4</i>                   | F | TCTGTATCTCACGCAGCTGTA    | 108 |
|                                                       | R | TGCTGGTGATACAAAACCGT     |     |
| <i>NADH-ubiquinone oxidoreductase</i>                 | F | AGCCCAATCCGATTCAACCA     | 109 |
|                                                       | R | CCTCGTACTGGCACTTCTCG     |     |
| <i>Nitrate reductase</i>                              | F | CCAGATCATGGCCGTCCTTT     | 102 |
|                                                       | R | ATTGCTTGGGGCATCAGTCA     |     |

|                                                       |   |                      |     |
|-------------------------------------------------------|---|----------------------|-----|
| <i>Nitrite reductase</i>                              | F | TGCAGGATCGTTGGTCACTC | 107 |
|                                                       | R | TGCCATCCACATTCTTCCCC |     |
| <i>Oxaloacetate hydrolase</i>                         | F | ACTGTACGCTGACGGTGTTT | 105 |
|                                                       | R | AGCGTTGGTCTTCATGTCGT |     |
| <i>Pectate lyase</i>                                  | F | CTCCAAGGCCATTTTGAGCG | 104 |
|                                                       | F |                      |     |
|                                                       | R | CGTTGGTCTCTCCCTTGACC |     |
| <i>Phenyloxazoline synthase</i>                       | F | GGCTCCATTGATGCCCCATA | 106 |
|                                                       | R | TCCGGTTTGACGACCCAAAA |     |
| <i>Phosphatidylserine<br/>decarboxylase</i>           | F | GGTCATCGGGATCTCACAGC | 103 |
|                                                       | R | CATGATTTGGCGCAGATGGG |     |
| <i>Phospholipase C</i>                                | F | GACCCTCGGTTACTTGTGGG | 108 |
|                                                       | R | AGAGTCGGAGGAGTAGAGCG |     |
| <i>Pre-mRNA-splicing factor</i>                       | F | AAGGAAATCGAAGAGGGCCG | 104 |
|                                                       | R | CGGTAGTACGGTTCGCTGTT |     |
| <i>Protein-L-isoaspartate<br/>O-methyltransferase</i> | F | TTATCACTGGCGATGGACGG | 109 |
|                                                       | R | CGCAACTGATCCACCAGAGT |     |
| <i>Superoxide dismutase</i>                           | F | CAGGAAGCGTTTGTCAAGGC | 103 |
|                                                       | R | TCTCAAGCCGTCCTTAGGA  |     |
| <i>Thioredoxin</i>                                    | F | CATCGCACCCAAGATCGAAG | 103 |
|                                                       | R | TACACCCAGCTCTTGTCCGA |     |
| <i>Ubiquitin carboxyl-terminal<br/>hydrolase</i>      | F | ATGGTTCGACAGCTACCACG | 101 |
|                                                       | R | CACTCCTCGTGCATCTCCTC |     |
| <i><math>\alpha</math>-L-Rhamnosidase</i>             | F | CATGGGTACTGGCAGCAAGA | 106 |
|                                                       | R | AGACGTGCCATGGTTTGGAT |     |
| <i><math>\beta</math>-actin</i>                       | F | TGTCACCAACTGGGACGATA | 101 |
|                                                       | R | GAGCTTCGGTCAAGAGGATG |     |

F and R indicated forward primer and reverse primer, respectively.

**Table S2** Summary of the reads quality in the present study.

| Sample name | Clean reads | Clean bases | GC Content (%) | Q30 (%) |
|-------------|-------------|-------------|----------------|---------|
| Pd-d-I      | 21847213    | 6536999320  | 54.06          | 94.83   |
| Pd-d-NI     | 23870541    | 7141474368  | 53.98          | 95.00   |
| Pd-wt-I     | 23294756    | 6966924166  | 53.62          | 94.85   |
| Pd-wt-NI    | 22149643    | 6621791146  | 54.01          | 94.84   |

**Table S3** Summary of percentages of reads mapping to the reference genome in the present four samples.

| Sample name           | Pd-d-I               | Pd-d-NI              | Pd-wt-I              | Pd-wt-NI             |
|-----------------------|----------------------|----------------------|----------------------|----------------------|
| Total reads           | 43694426             | 47741082             | 46589512             | 44299286             |
| Mapped reads          | 41903504<br>(95.90%) | 44888991<br>(94.03%) | 40876823<br>(87.74%) | 41656928<br>(94.04%) |
| Unique Mapped reads   | 40979275<br>(93.79%) | 44103959<br>(92.38%) | 40232931<br>(86.36%) | 40744683<br>(91.98%) |
| Multiple mapped reads | 924229<br>(2.12%)    | 785032<br>(1.64%)    | 643892<br>(1.38%)    | 912245<br>(2.06%)    |
| Reads map to '+'      | 20296757<br>(46.45%) | 21930967<br>(45.94%) | 20120079<br>(43.19%) | 20160549<br>(45.51%) |
| Reads map to '-'      | 20669287<br>(47.30%) | 22221843<br>(46.55%) | 20257660<br>(43.48%) | 20554396<br>(46.40%) |

**Table S4** SNP analysis in the present four samples.

| Sample name | SNP Number | Genic SNP | Intergenic SNP | Transition | Transversion | Heterozygosity |
|-------------|------------|-----------|----------------|------------|--------------|----------------|
| Pd-d-I      | 2,458      | 1,592     | 866            | 61.92%     | 38.08%       | 33.52%         |
| Pd-d-NI     | 2,527      | 1,609     | 918            | 61.65%     | 38.35%       | 35.30%         |
| Pd-wt-I     | 2,311      | 1,511     | 800            | 62.48%     | 37.52%       | 31.03%         |
| Pd-wt-NI    | 2,580      | 1,675     | 905            | 61.94%     | 38.06%       | 35.47%         |

**Table S5** DEG numbers in the present four comparative groups.

| Comparative group | DEG Number |              |                |
|-------------------|------------|--------------|----------------|
|                   | All        | Up-regulated | Down-regulated |
| Pd-wt-(I/Ni)      | 460        | 240          | 220            |
| Pd-d-(I/Ni)       | 147        | 50           | 97             |
| I-(Pd-d/Pd-wt)    | 1,221      | 608          | 613            |
| Ni-(Pd-d/Pd-wt)   | 717        | 366          | 351            |

**Table S6** Number summary of the DEGs functionally annotated in the eight public databases.

| Database | Pd-wt-(I/Ni) | Pd-d-(I/Ni) | I-(Pd-d/Pd-wt) | Ni-(Pd-d/Pd-wt) |
|----------|--------------|-------------|----------------|-----------------|
| COG      | 147          | 32          | 409            | 258             |
| KOG      | 170          | 35          | 486            | 288             |
| GO       | 243          | 68          | 689            | 408             |
| KEGG     | 73           | 18          | 299            | 162             |



|            |     |     |      |     |
|------------|-----|-----|------|-----|
| Pfam       | 258 | 65  | 750  | 434 |
| Swiss-Port | 196 | 51  | 586  | 346 |
| eggNOG     | 364 | 104 | 1044 | 577 |
| Nr         | 426 | 128 | 1167 | 676 |
| Total      | 427 | 128 | 1169 | 676 |
